# Supplementary material for: Mono(boratabenzene) rare-earth metal dialkyl complexes: synthesis, structure and catalytic behaviors for styrene polymerization
Source: Royal Society of Chemistry journal article supplement (doi:10.1039/c4dt04043k), 2015-01-01
Supplement: c4dt04043k1.pdf [file c4dt04043k1.pdf]

*Supporting Information*

**Mono(boratabenzene) rare-earth metal dialkyl complexes: synthesis,  
structure and catalytic behaviors for styrene polymerization**

Xiufang Wang, Xuebing Leng, Yaofeng Chen\*

State Key Laboratory of Organometallic Chemistry, Shanghai Institute of Organic Chemistry,  
Chinese Academy of Sciences, 345 Lingling Road, Shanghai 200032, People's Republic of China

Contents

|                                                                                                 |    |
|-------------------------------------------------------------------------------------------------|----|
| 1. Molecular structure of complex <b>2</b> .....                                                | S1 |
| 2. <sup>1</sup> H ( <sup>13</sup> C, <sup>11</sup> B) NMR spectra of complexes <b>1-4</b> ..... | S2 |

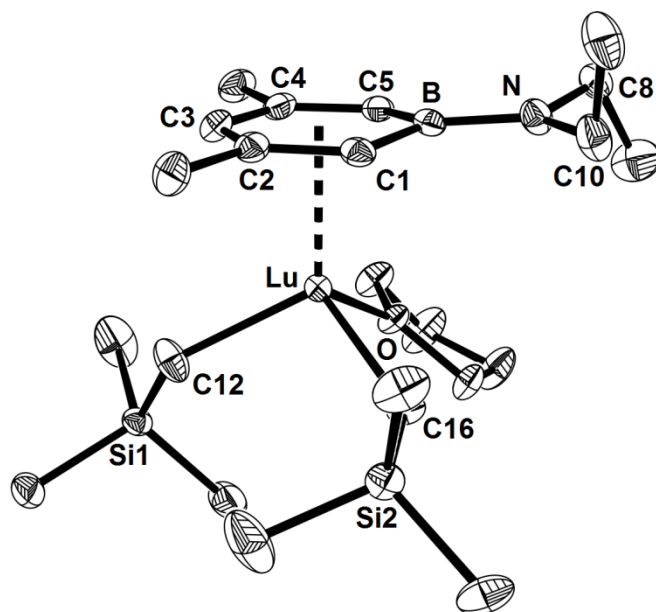

**Fig. S1** Molecular structure of **2** with thermal ellipsoids set at 30% probability. Hydrogen atoms have been omitted for clarity. Selected bond lengths (Å) and angles (°): Lu–B 2.819(3), Lu–C1 2.663(3), Lu–C2 2.657(3), Lu–C3 2.655(3), Lu–C4 2.703(3), Lu–C5 2.712(3), Lu–C12 2.317(3), Lu–C16 2.323(3), Lu–O 2.248(2), B–N 1.436(4), B–N–C8 123.0(3), B–N–C10 122.0(3), C8–N–C10 114.7(3).

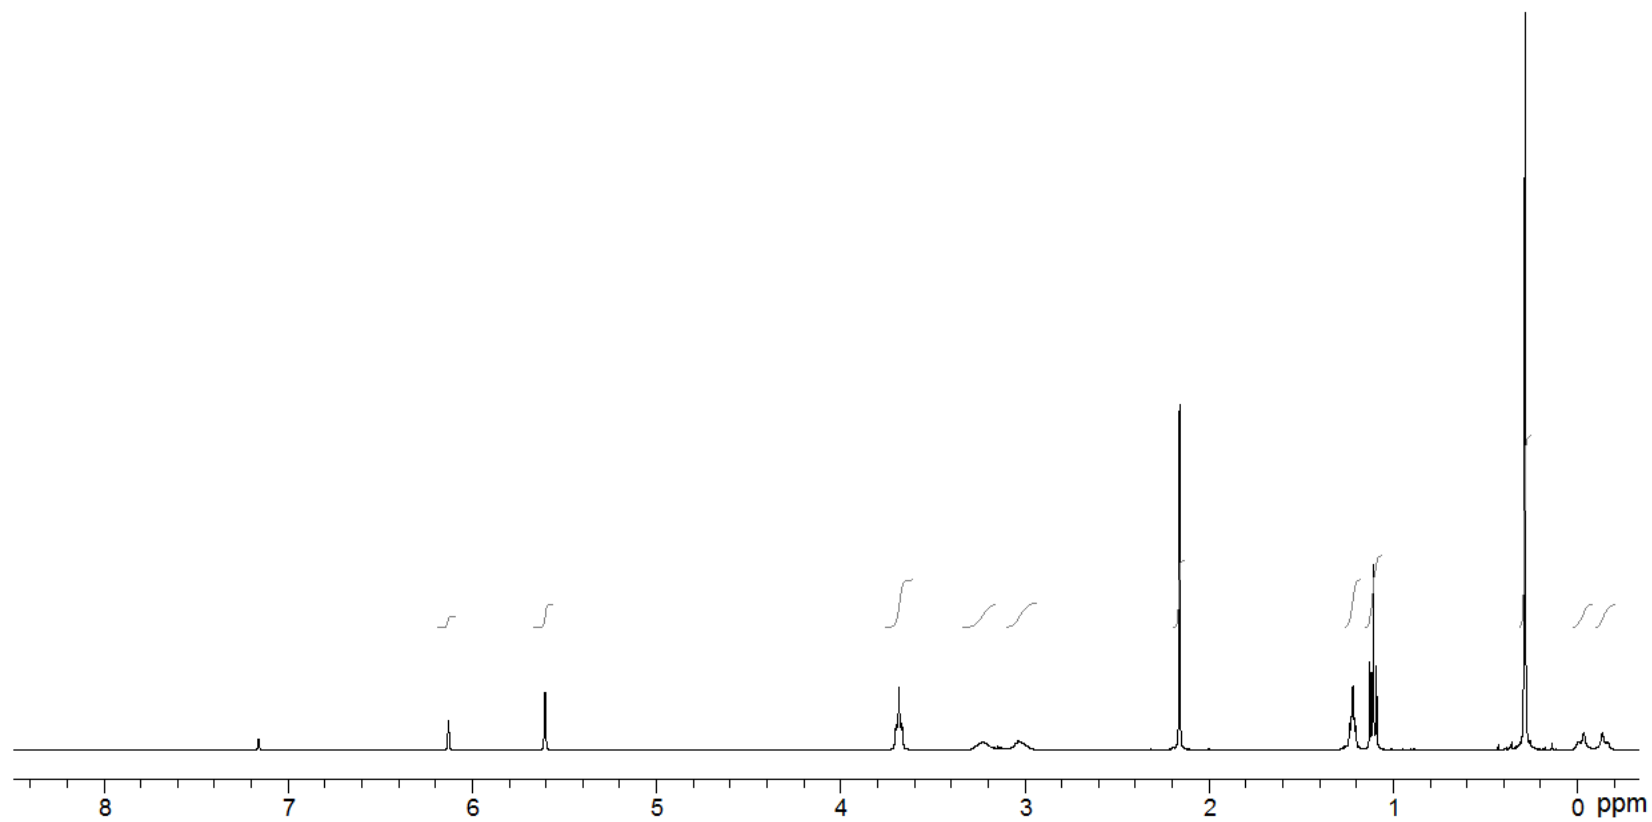

**Fig. S2**  $^1\text{H}$  NMR spectrum of **1** (400 MHz,  $\text{C}_6\text{D}_6$ , 25  $^\circ\text{C}$ ).

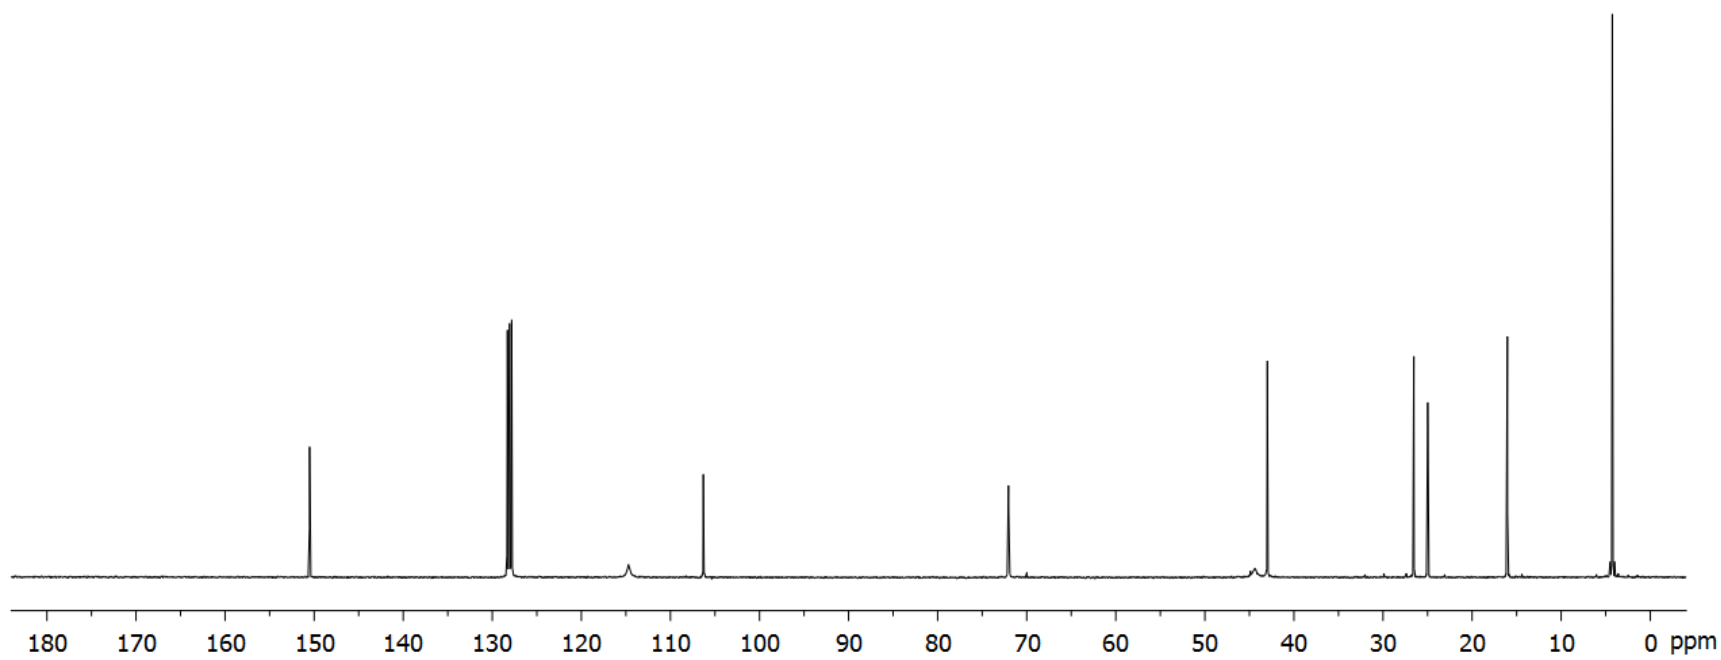

**Fig. S3**  $^{13}\text{C}$  NMR spectrum of **1** (100 MHz,  $\text{C}_6\text{D}_6$ , 25  $^\circ\text{C}$ ).

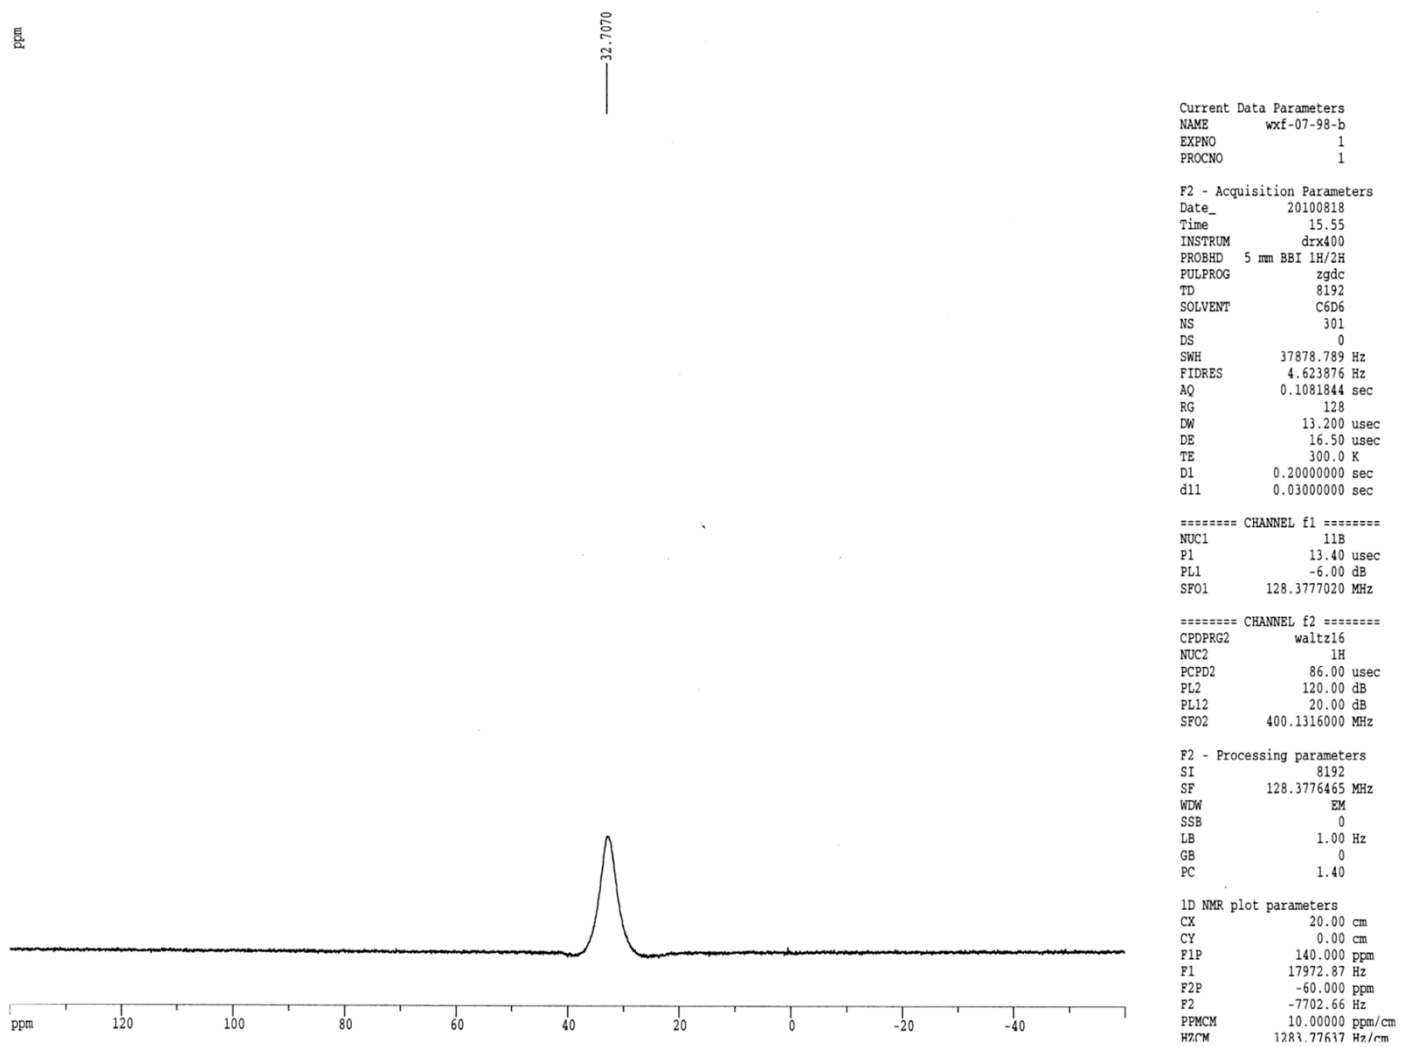

**Fig. S4**  $^{11}\text{B}$  NMR spectrum of **1** (128 MHz,  $\text{C}_6\text{D}_6$ , 25  $^\circ\text{C}$ ).

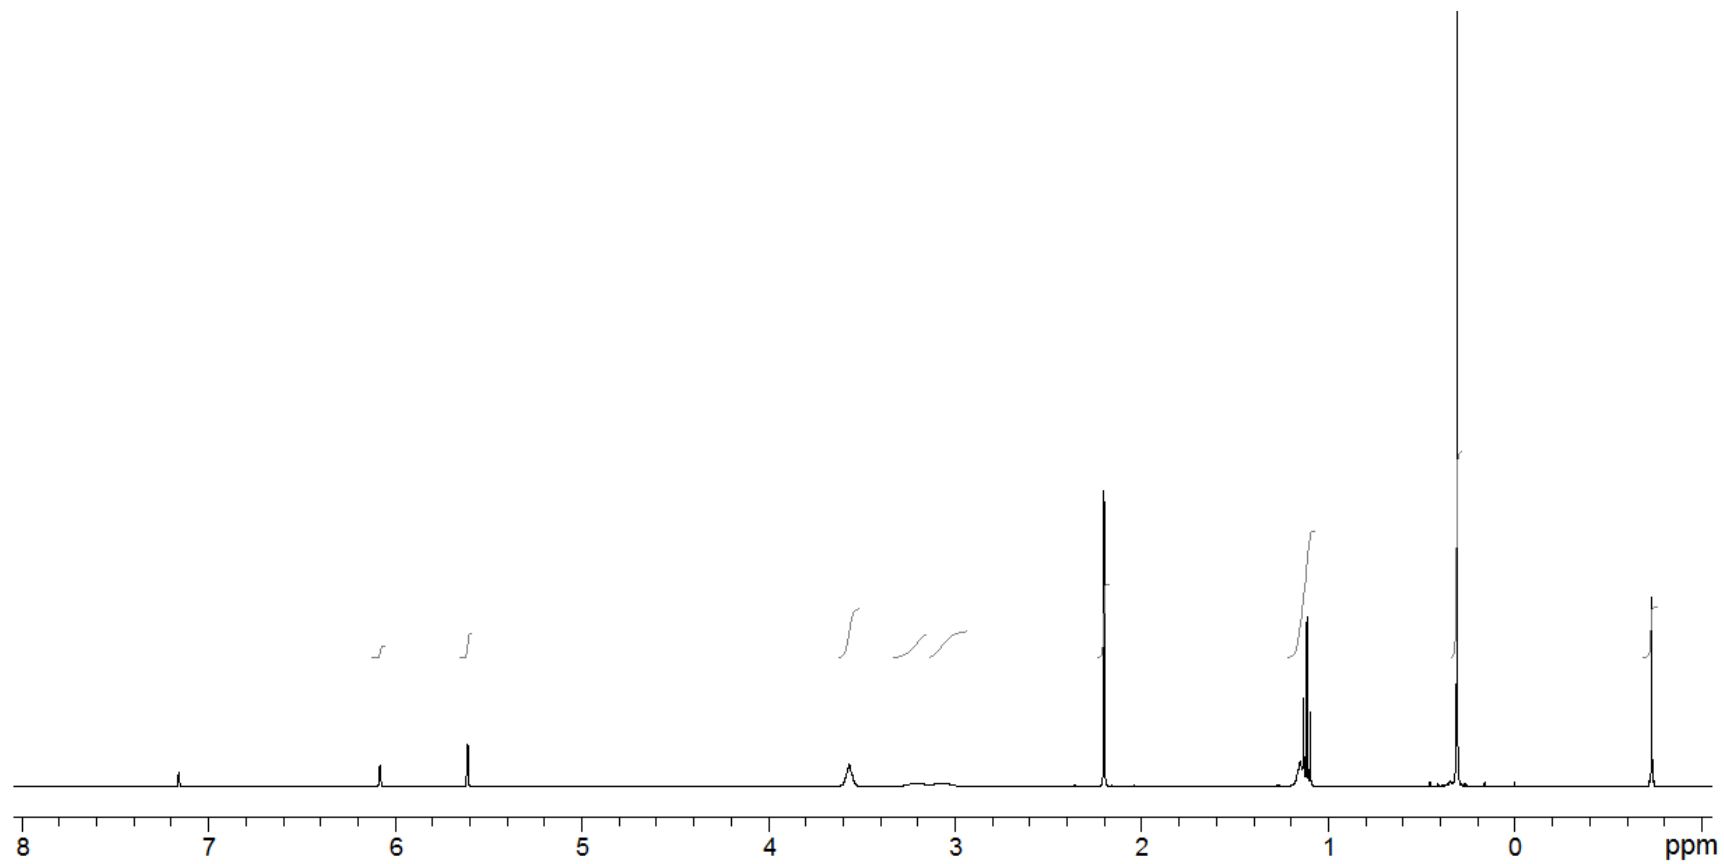

**Fig. S5**  $^1\text{H}$  NMR spectrum of **2** (400 MHz,  $\text{C}_6\text{D}_6$ , 25  $^\circ\text{C}$ ).

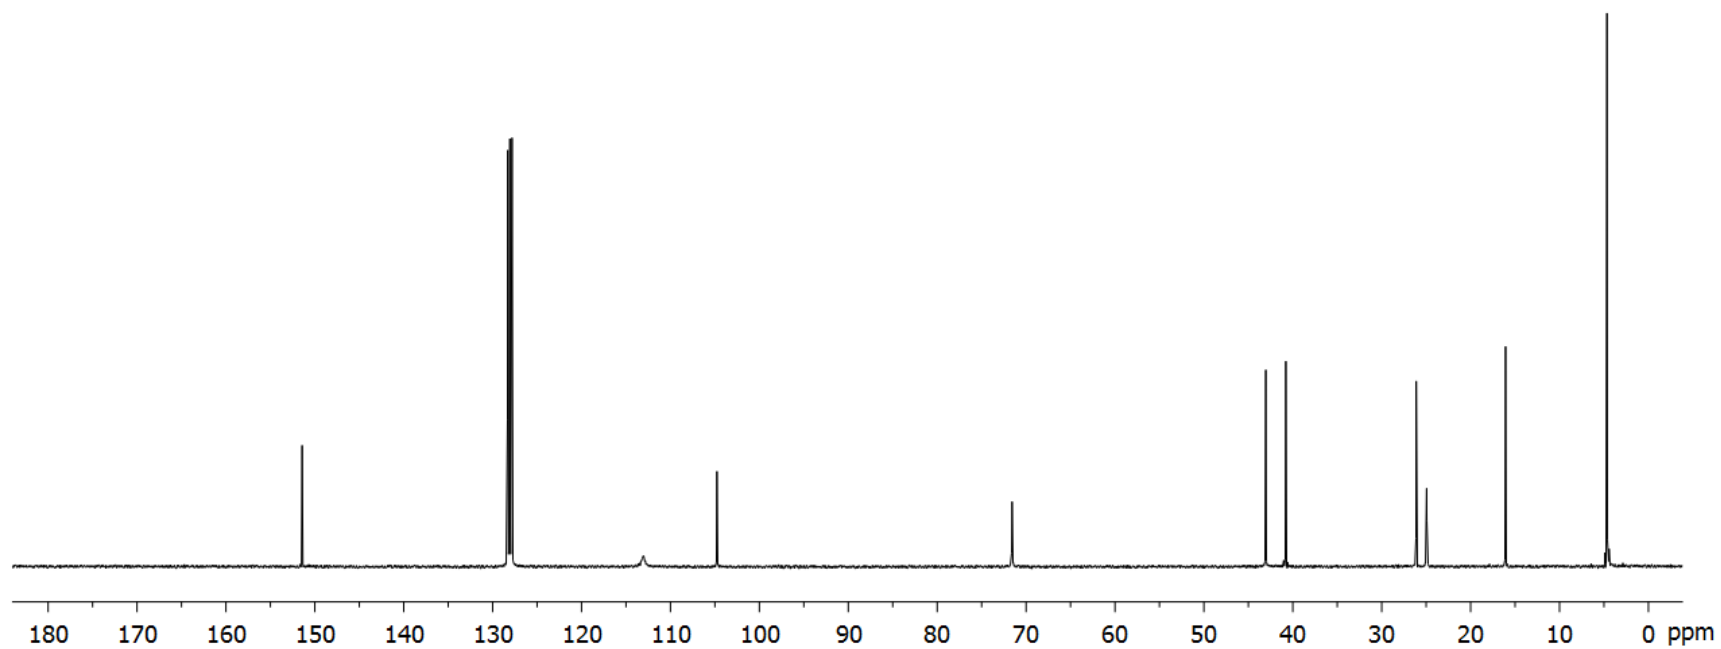

**Fig. S6**  $^{13}\text{C}$  NMR spectrum of **2** (100 MHz,  $\text{C}_6\text{D}_6$ , 25  $^\circ\text{C}$ ).

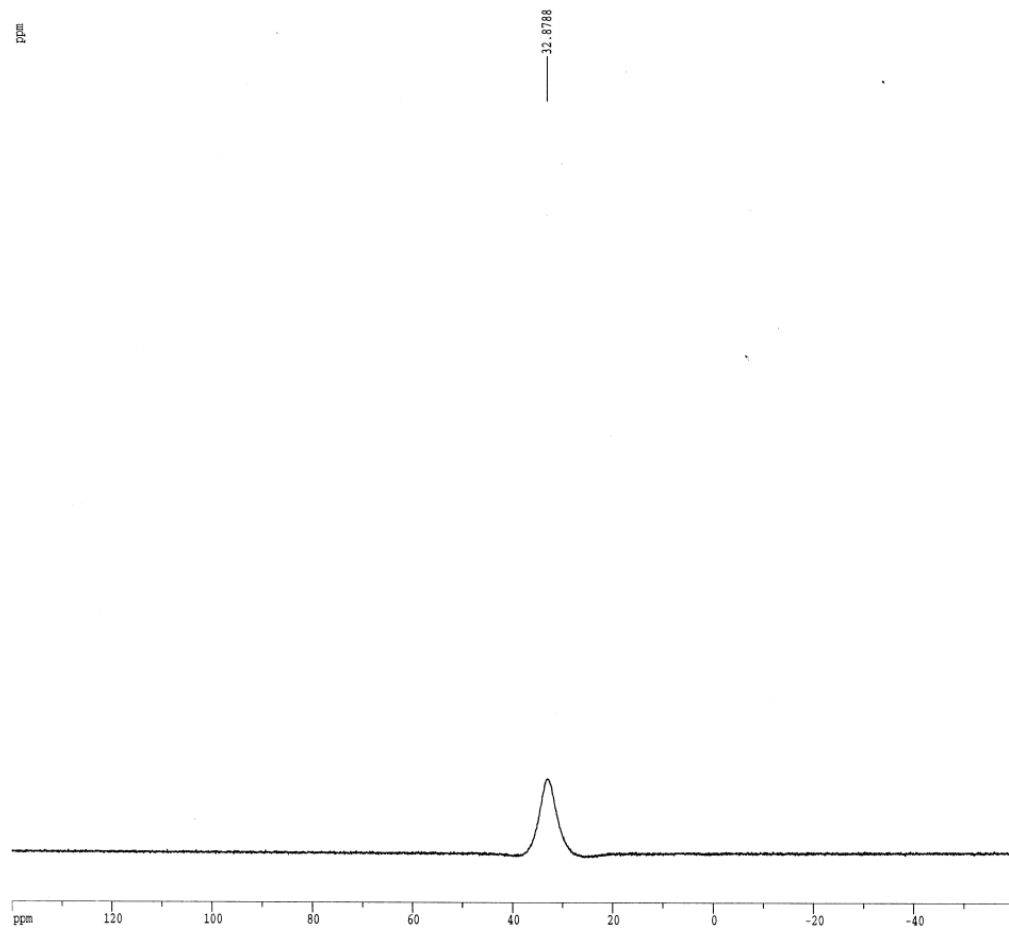

```

Current Data Parameters
NAME      wxf-07-95-b
EXPNO     1
PROCNO    1

F2 - Acquisition Parameters
Date_     20100818
Time      15.49
INSTRUM   drx400
PROBHD    5 mm BBI 1H/2H
PULPROG   zgdc
TD         8192
SOLVENT   C6D6
NS         300
DS         0
SWH        37878.789 Hz
FIDRES     4.623876 Hz
AQ         0.1081844 sec
RG         32
DW         13.200 usec
DE         16.50 usec
TE         300.0 K
D1         0.20000000 sec
d11        0.03000000 sec

===== CHANNEL f1 =====
NUC1       11B
P1         13.40 usec
PL1        -6.00 dB
SFO1       128.3777020 MHz

===== CHANNEL f2 =====
CPDPRG2    waltz16
NUC2       1H
PCPD2      86.00 usec
PL2        120.00 dB
PL12       20.00 dB
SFO2       400.1316000 MHz

F2 - Processing parameters
SI         8192
SF         128.3776465 MHz
WDW        EM
SSB        0
LB         1.00 Hz
GB         0
PC         1.40

1D NMR plot parameters
CX         20.00 cm
CY         0.00 cm
F1P        140.000 ppm
F1         17972.87 Hz
F2P        -60.000 ppm
F2         -7702.66 Hz
PPMCM      10.00000 ppm/cm
HZCM       1283.77637 Hz/cm

```

**Fig. S7**  $^{11}\text{B}$  NMR spectrum of **2** (128 MHz,  $\text{C}_6\text{D}_6$ , 25  $^\circ\text{C}$ ).



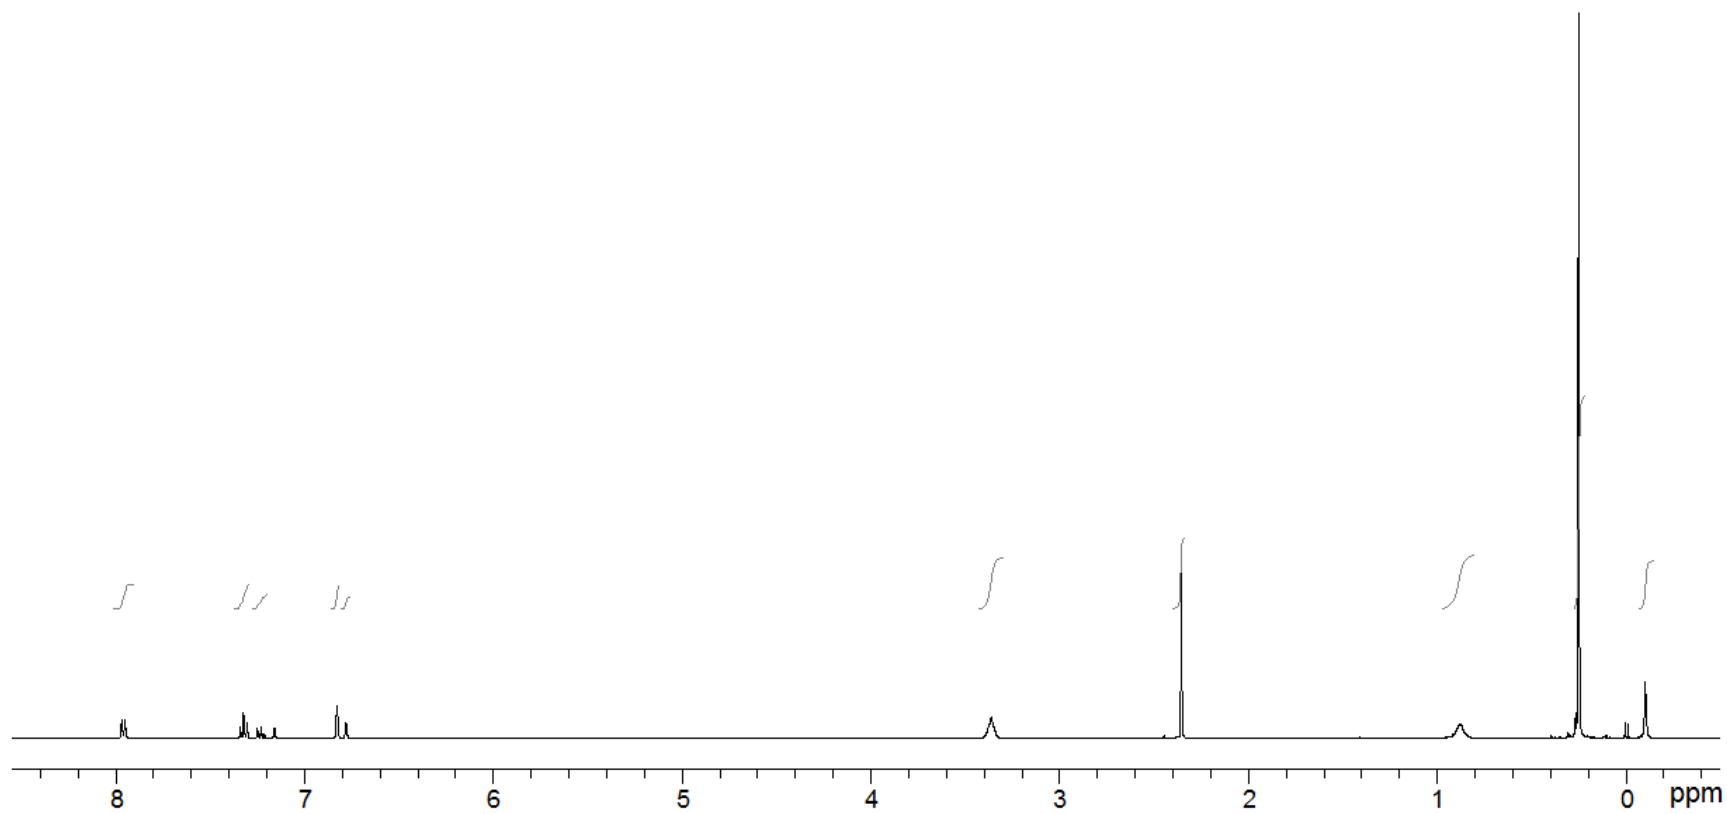

**Fig. S8**  $^1\text{H}$  NMR spectrum of **3** (400 MHz,  $\text{C}_6\text{D}_6$ , 25  $^\circ\text{C}$ ).

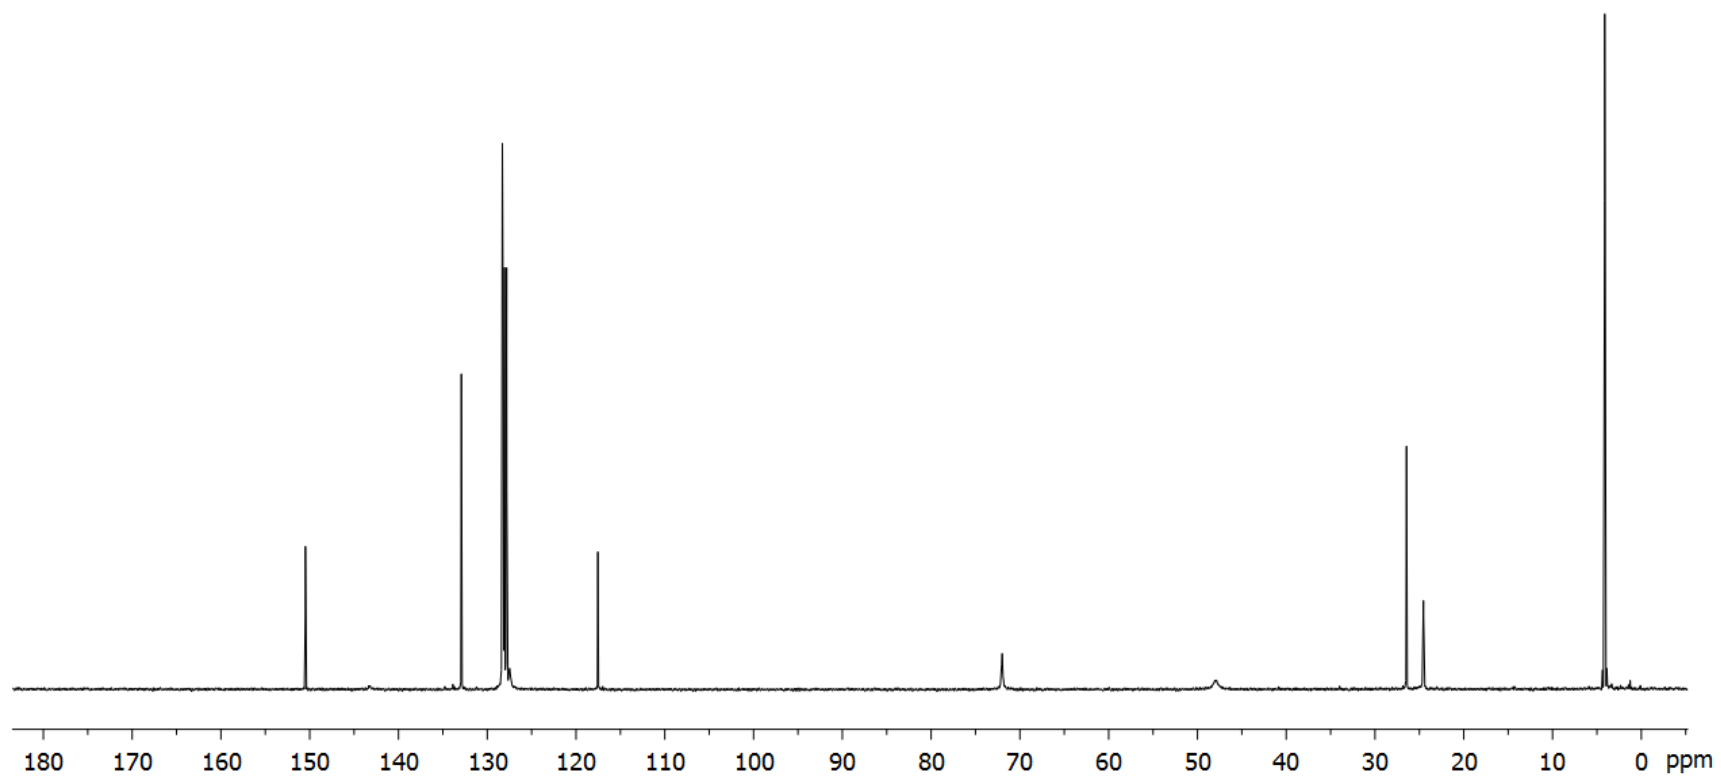

**Fig. S9**  $^{13}\text{C}$  NMR spectrum of **3** (100 MHz,  $\text{C}_6\text{D}_6$ , 25  $^\circ\text{C}$ ).

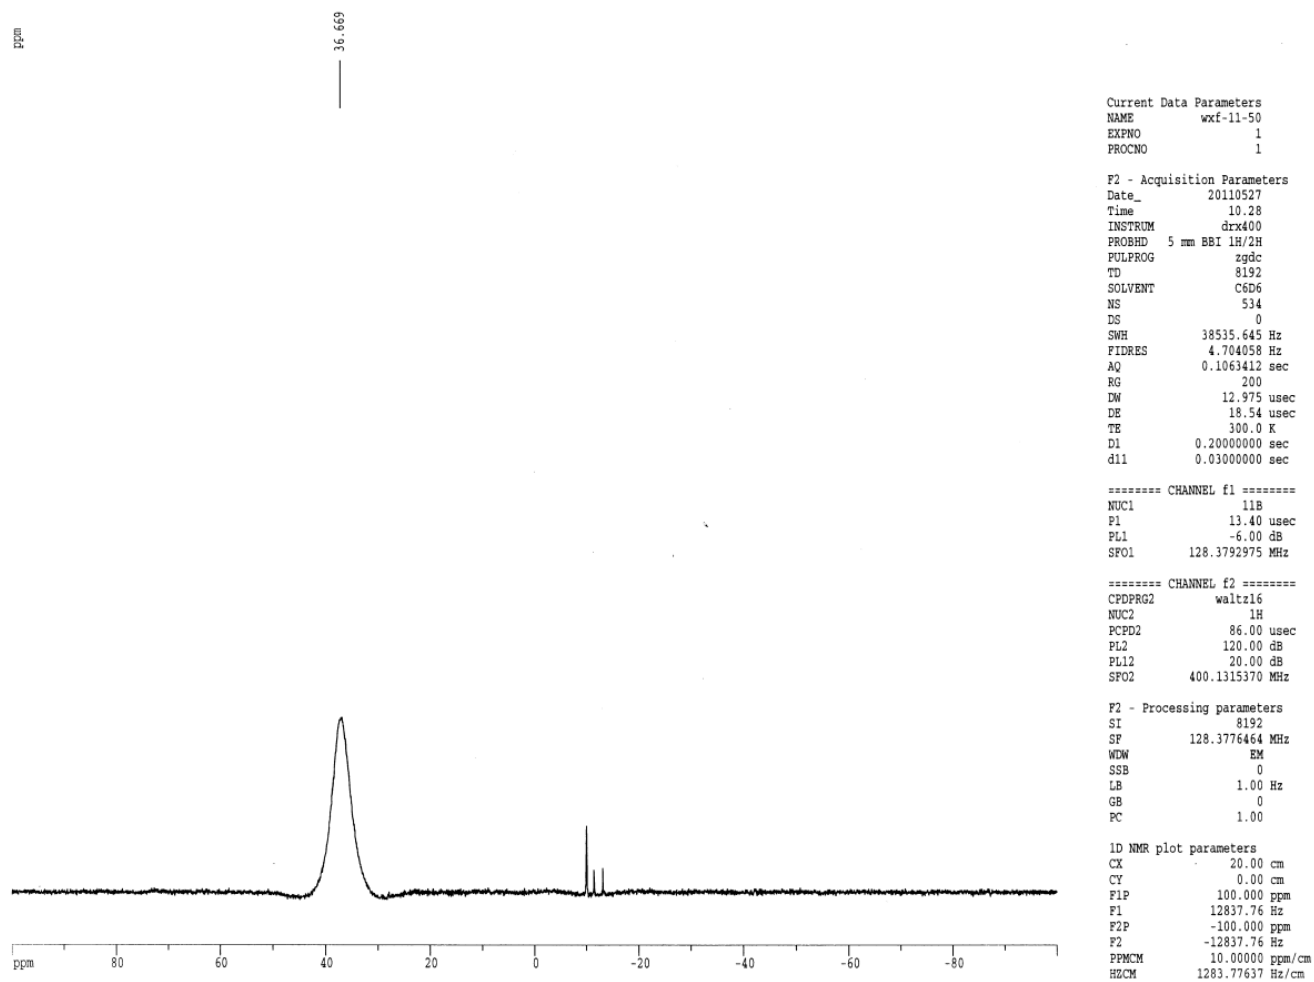

Fig. S10  $^{11}\text{B}$  NMR spectrum of **3** (128 MHz,  $\text{C}_6\text{D}_6$ , 25  $^\circ\text{C}$ ).

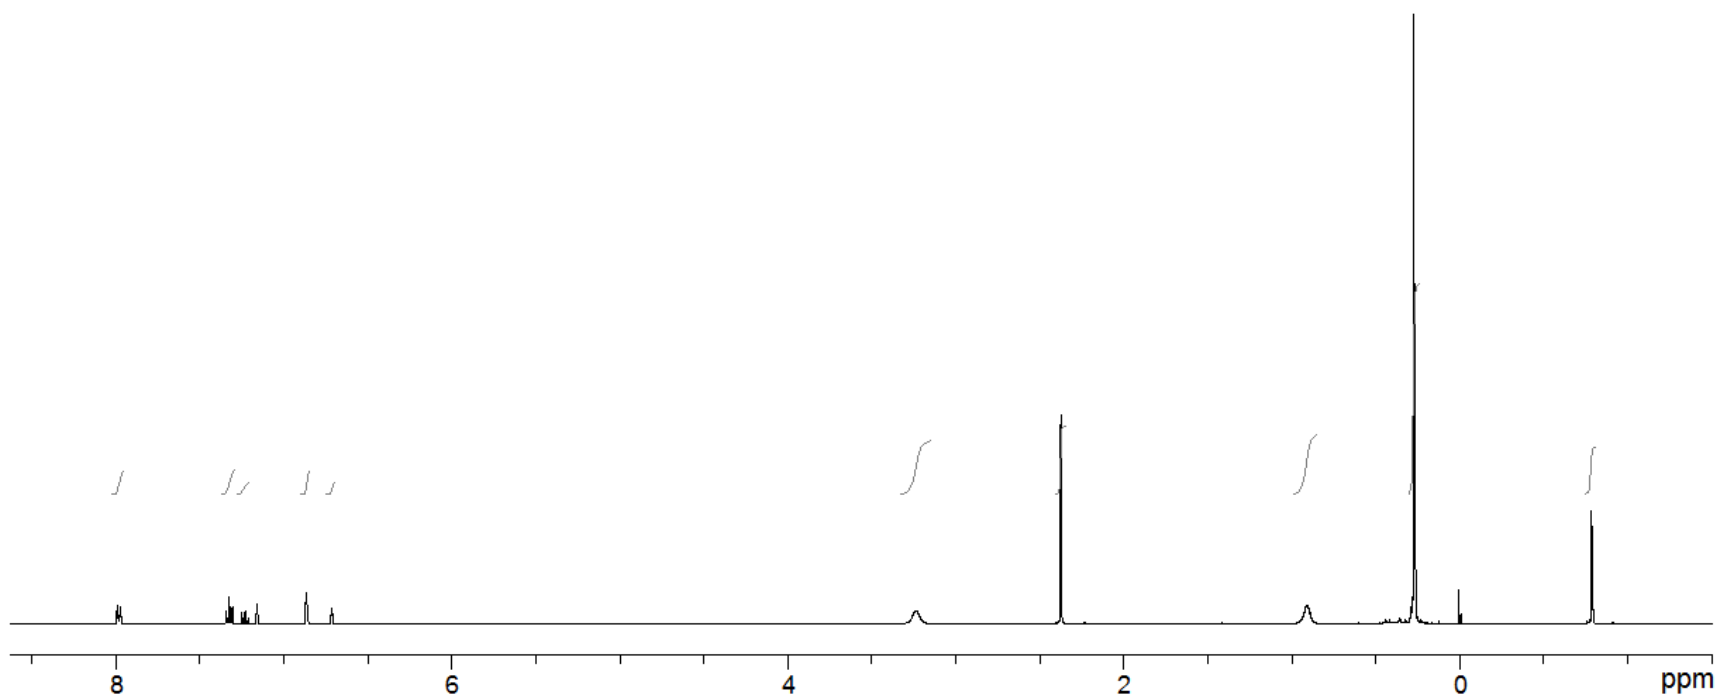

**Fig S11**  $^1\text{H}$  NMR spectrum of **4** (400 MHz,  $\text{C}_6\text{D}_6$ , 25  $^\circ\text{C}$ ).

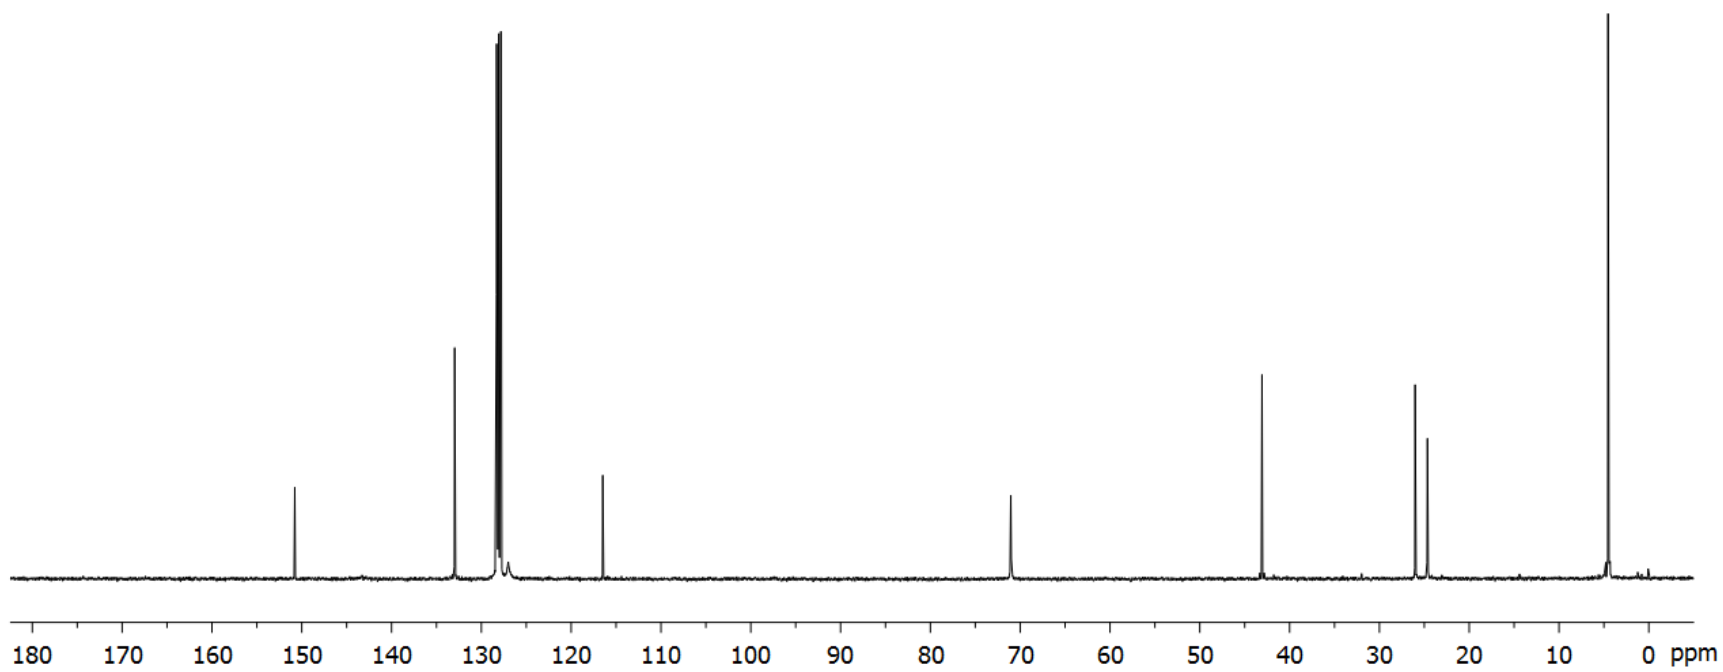

**Fig. S12**  $^{13}\text{C}$  NMR spectrum of **4** (100 MHz,  $\text{C}_6\text{D}_6$ , 25  $^\circ\text{C}$ ).

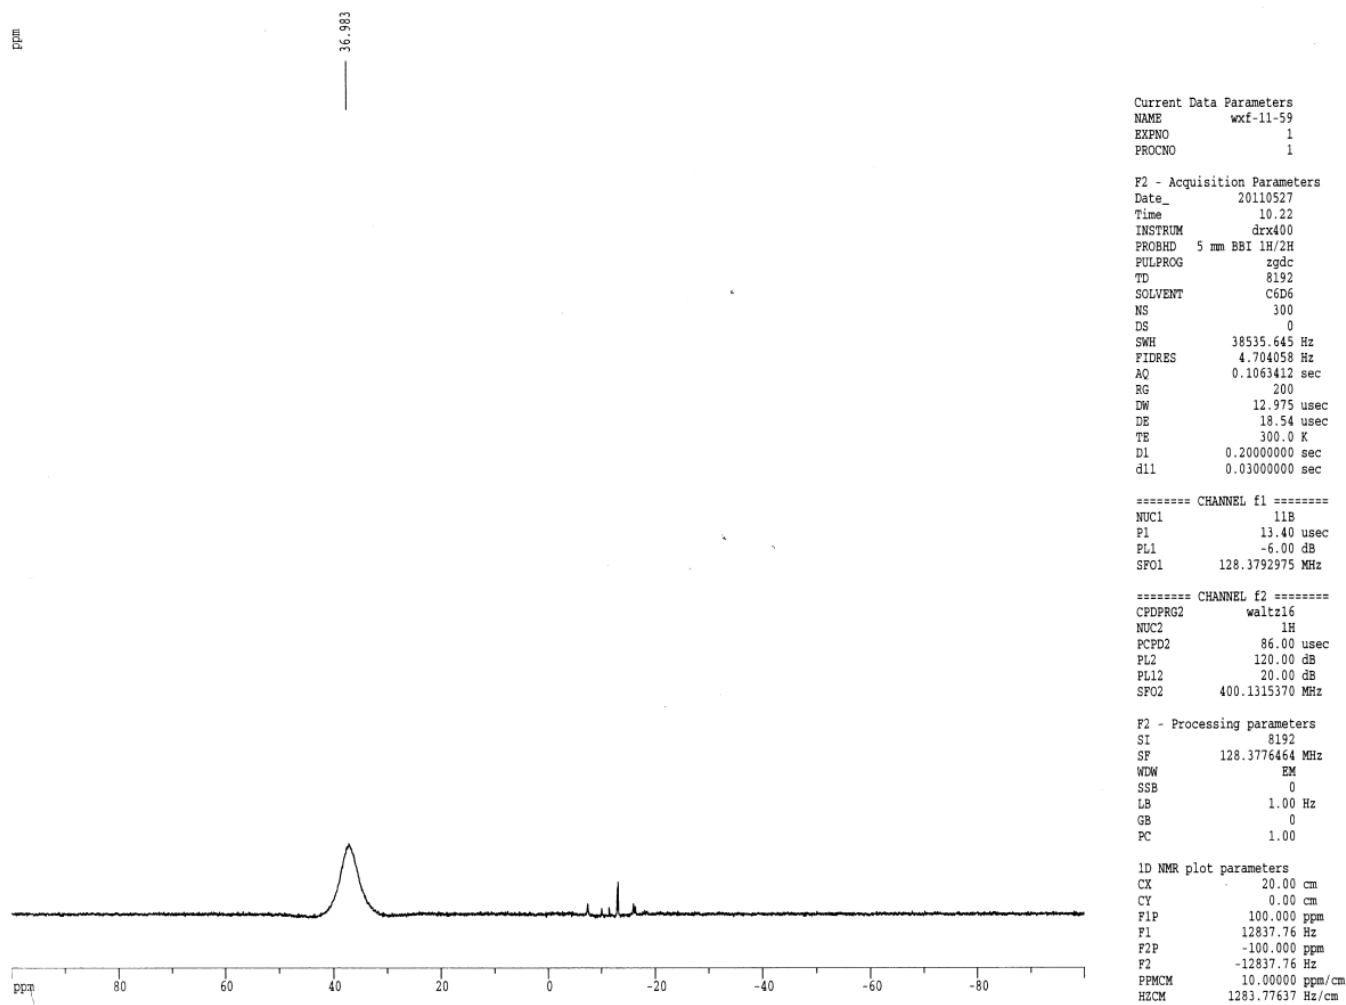

Fig. S13  $^{11}\text{B}$  NMR spectrum of **4** (128 MHz,  $\text{C}_6\text{D}_6$ , 25  $^\circ\text{C}$ ).
